# Supplementary material for: Synthesis and bioactivity of a conjugate composed of green tea catechins and hyaluronic acid
Source: Royal Society of Chemistry journal article supplement (doi:10.1039/c5py00495k), 2015-01-01
Supplement: c5py00495k1.pdf [file c5py00495k1.pdf]

Electronic Supplementary Information (ESI)

**Synthesis and bioactivity of a conjugate composed of green tea catechin and  
hyaluronic acid**

Fan Lee, Jaehong Lim, Michael R. Reithofer, Su Seong Lee, Joo Eun Chung, Charlotte A.E.

Hauser and Motoichi Kurisawa\*

*Institute of Bioengineering and Nanotechnology, 31 Biopolis Way, The Nanos, #04-01, 138669,  
Singapore*

\*Tel.: +65-6824-7139. Fax: +65-6478-9083. E-mail: mkurisawa@ibn.a-star.edu.sg

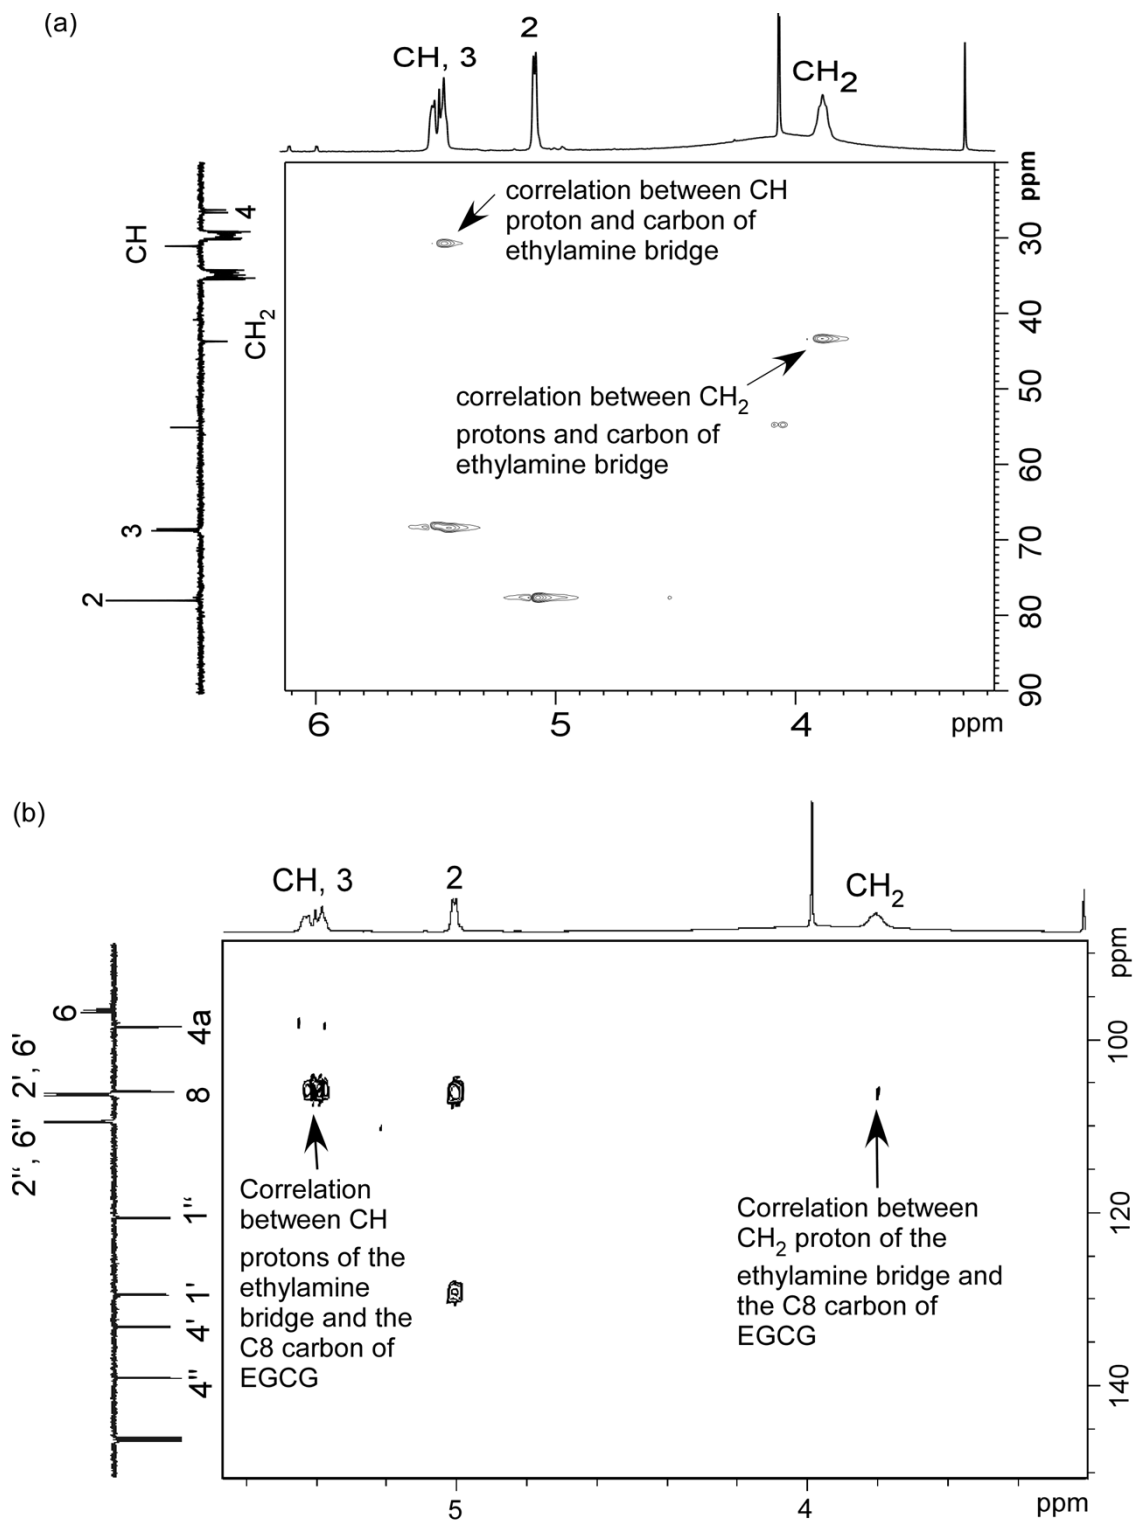

**Fig. S1** (a) HSQC spectrum of **2** (8-8 isomer) showing the correlations between the protons and carbons of ethylamine bridge. (b) HMBC spectrum of **2** showing the correlations between the protons and of ethylamine bridge and C8 of EGCG.

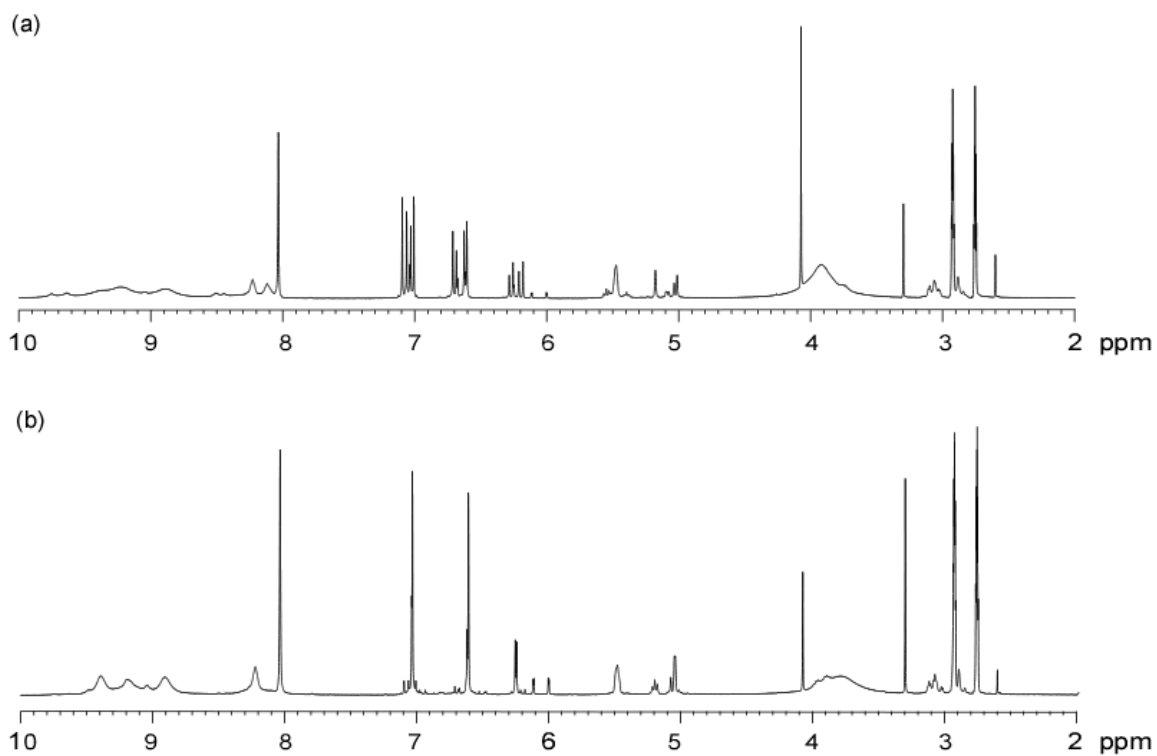

**Fig. S2**  $^1\text{H}$  spectra of (a) **3a** and **3b** (6-8 isomers) and (b) **4** (6-6 isomer).

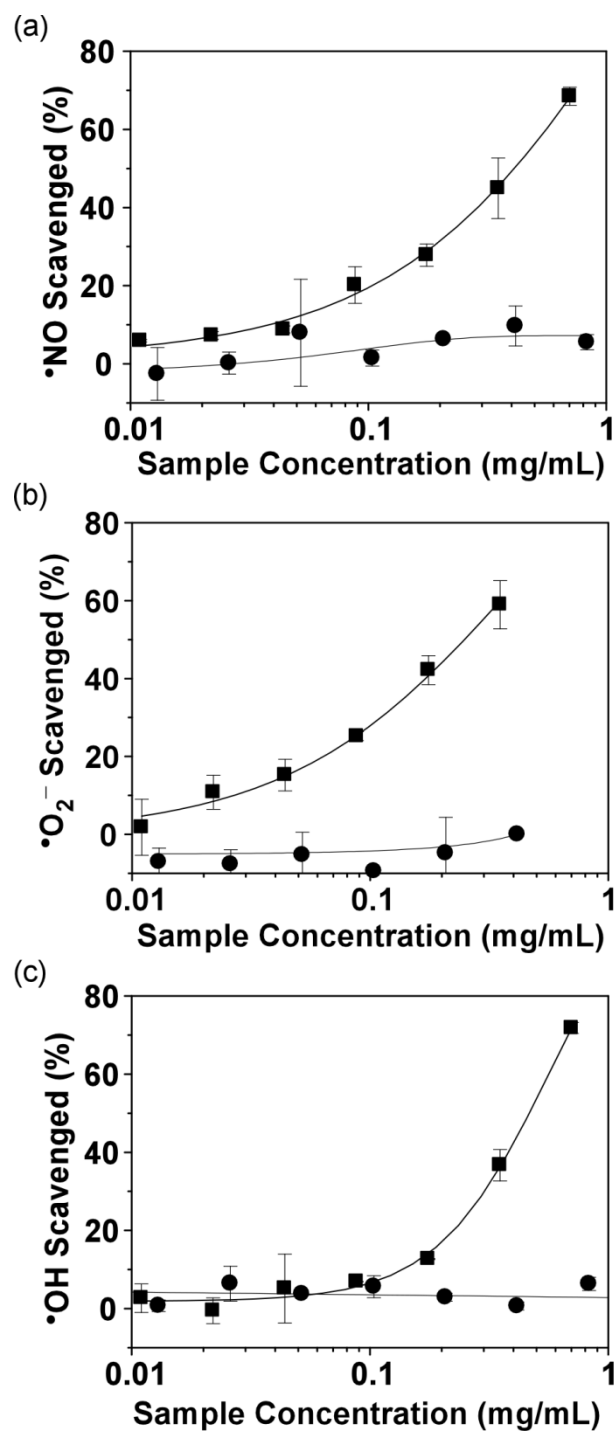

**Fig. S3** Radical scavenging activities of HA (●) and HA-EGCG conjugates (■) against (a)  $\bullet$ NO, (b)  $\bullet$ O<sub>2</sub><sup>-</sup> and (c)  $\bullet$ OH (n = 2, mean ± s.d.).
